# Supplementary material for: An automatable platform for genotoxicity testing of nanomaterials based on the fluorometric γ-H2AX assay reveals no genotoxicity of properly surface-shielded cadmium-based quantum dots
Source: Royal Society of Chemistry journal article supplement (doi:10.1039/c9nr01021a), 2019-01-01
Supplement: c9nr01021a1.pdf [file c9nr01021a1.pdf]

– Electronic Supplementary Information (ESI) –

**Automatable platform for genotoxicity testing of nanomaterials  
based on the fluorometric  $\gamma$ -H2AX assay reveals no genotoxicity  
of properly surface-shielded cadmium-based quantum dots**

*D. Geißler<sup>1</sup>, M. Wegmann<sup>1,2</sup>, T. Jochum<sup>3</sup>, V. Somma<sup>2</sup>, M. Sowa<sup>2</sup>, J. Scholz<sup>2</sup>, E. Fröhlich<sup>4</sup>, K. Hoffmann<sup>1</sup>,  
J. Niehaus<sup>3</sup>, D. Roggenbuck<sup>2,5</sup>, and U. Resch-Genger<sup>1\*</sup>*

<sup>1</sup> Bundesanstalt für Materialforschung und -prüfung (BAM), Division 1.2 Biophotonics, Richard-Willstätter-Str. 11, 12489 Berlin, Germany

<sup>2</sup> MEDIPAN GmbH, Ludwig-Erhard-Ring 3, 15827 Dahlewitz, Germany

<sup>3</sup> Fraunhofer-Zentrum für Angewandte Nanotechnologie CAN, Grindelallee 117, 20146 Hamburg, Germany

<sup>4</sup> Medizinische Universität Graz, Zentrum für Medizinische Forschung (ZMF), Stiftingtalstrasse 24, 8010 Graz, Austria

<sup>5</sup> Institute of Biotechnology, Faculty Environment and Natural Sciences, Brandenburg University of Technology

\*Correspondence and requests for materials should be addressed to U.R.-G. (email: [ute.resch@bam.de](mailto:ute.resch@bam.de))

**Content**

- Figure S1.** TEM images of the Au-NP and FeO<sub>x</sub>-NP.
- Figure S2.** TEM images of the Cd-based QD.
- Figure S3.** Schematic representation of the micellar encapsulation strategy.
- Figure S4.** Number-weighted DLS size distributions of the Au-NP, FeO<sub>x</sub>-NP, and C-QD, as well as the empty PI-*b*-PEG micelles.
- Table S1** Total amount of protonable/deprotonable surface functional groups as measured with conductimetric acid/base titration.
- Figure S5.** Comparison of the genotoxicity of the Au-NP, FeO<sub>x</sub>-NP, and Cd-based QD at a particle concentration of 100 pM.
- Figure S6.** Detailed statistical analysis of genotoxicity of FeO<sub>x</sub>-NP (negative control).
- Figure S7.** Detailed statistical analysis of genotoxicity of Au-NP (positive control).

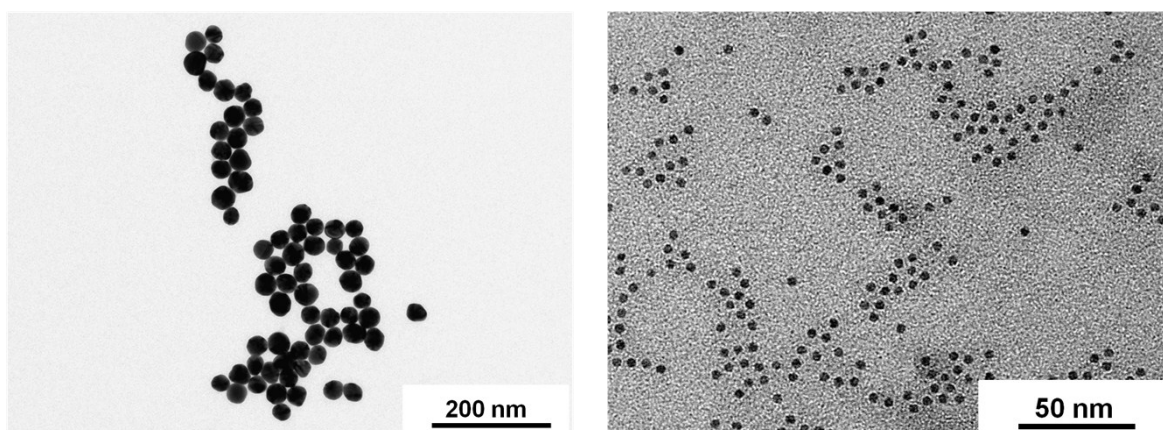

**Figure S1.** TEM images of the 30 nm Au-NP (*left*) and the 4 nm FeO<sub>x</sub>-NP (*right*).

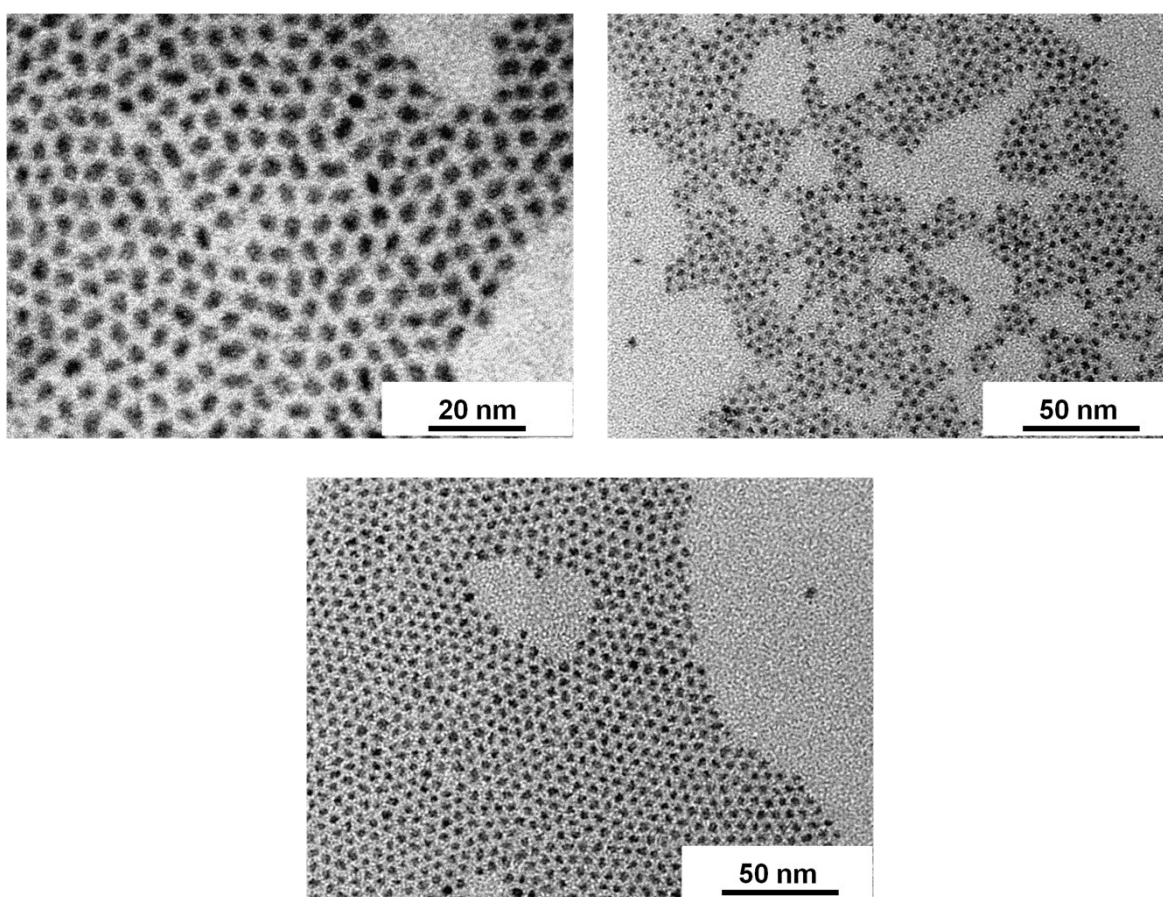

**Figure S2.** TEM images of the Cd-based quantum dots with different shell compositions: C-QD (CdSe core only, *top left*), CS-QD (CdSe/CdS core/shell, *top right*), and CSS-QD (CdSe/CdS/ZnS core/shell/shell, *bottom*).

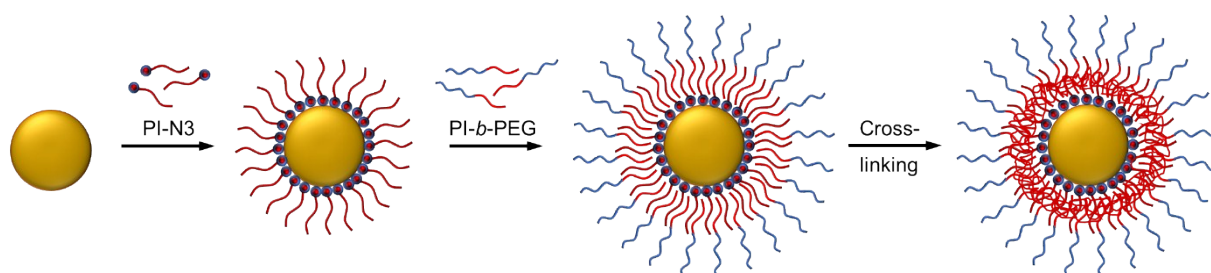

**Figure S3** Micellar encapsulation of nanoparticles as applied for the  $\text{FeO}_x$ -NP and the different Cd-based QD. The native apolar surface ligands present after NP synthesis are partly exchanged with polyisoprene-diethylenetriamine (PI-N3), then polyisoprene-*b*-polyethylene glycol di-block copolymer (PI-*b*-PEG) is added, and the PI units are cross-linked using a radical initiator (AIBN) to yield a stable, water-soluble NP dispersion.

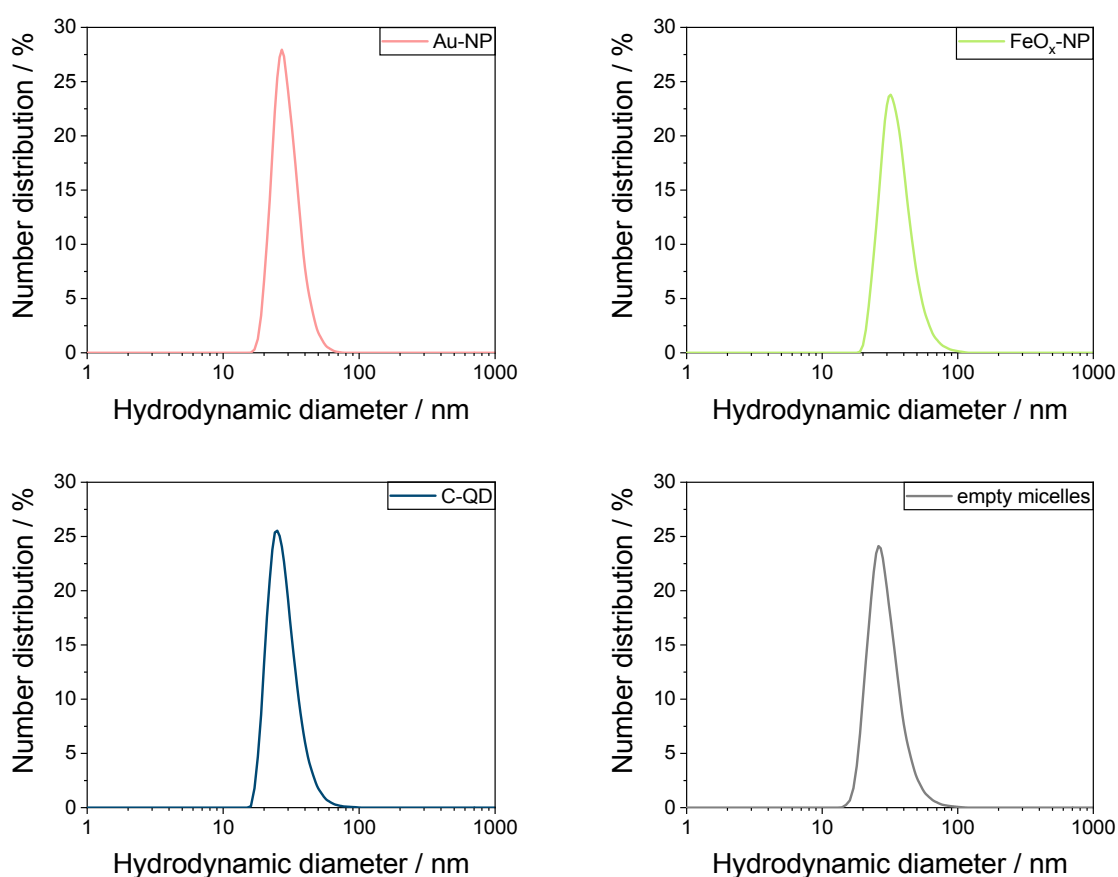

**Figure S4.** Representative number-weighted size distributions measured with DLS for the citrate-stabilized 30 nm Au-NP (*top left*), as well as the 4 nm  $\text{FeO}_x$ -NP (*top right*) and the CdSe core only QD (C-QD, *bottom left*) after micellar encapsulation in comparison to the (empty) PI-*b*-PEG micelles (*bottom right*), demonstrating that the micellar encapsulated  $\text{FeO}_x$ -NP and Cd-based QD have the same size (ca. 30 nm) as the citrate-stabilized Au-NP.

**Table S1.** Total amount of protonable/deprotonable functional groups (FG) on the particle surface as measured using conductimetric acid/base titration.

| Particle             | Surface ligands           | FG               | FG/NP     |
|----------------------|---------------------------|------------------|-----------|
| Au-NP                | Citrate                   | -COOH            | > 10,000  |
| FeO <sub>x</sub> -NP | PI-N3 / PI- <i>b</i> -PEG | -NH <sub>2</sub> | 220 ± 20  |
| C-QD                 | PI-N3 / PI- <i>b</i> -PEG | -NH <sub>2</sub> | 170 ± 20  |
| CS-QD                | PI-N3 / PI- <i>b</i> -PEG | -NH <sub>2</sub> | 165 ± 10  |
| CSS-QD               | PI-N3 / PI- <i>b</i> -PEG | -NH <sub>2</sub> | 190 ± 10  |
| Empty micelles       | PI-N3 / PI- <i>b</i> -PEG | -NH <sub>2</sub> | 1100 ± 60 |

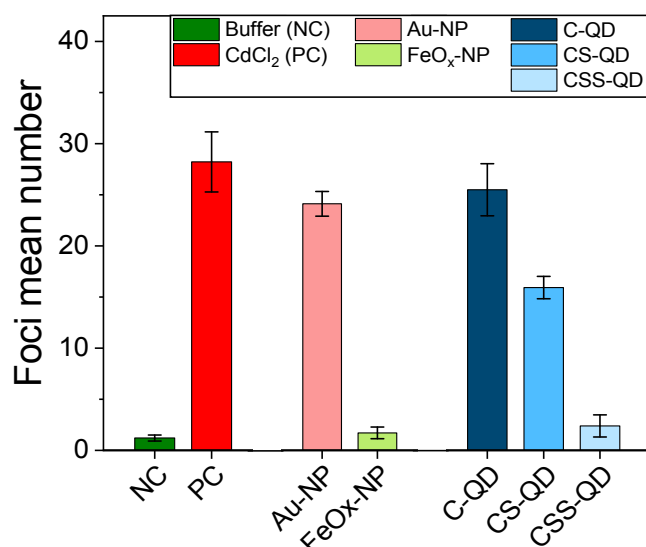

**Figure S5.** Comparison of the genotoxicity in Hep2 cells for the potential reference particles Au-NP (positive control) and FeO<sub>x</sub>-NP (negative control) at a particle concentration of 250 pM, as well as the Cd-based quantum dots with different shell compositions (C-QD = CdSe core only QD, CS-QD = CdSe/CdS core/shell QD, CSS-QD = CdSe/CdS/ZnS core/shell/shell QD) at a particle concentration of 100 pM, in comparison to established toxicity standards (buffer as negative control and CdCl<sub>2</sub> as positive control). Error bars represent the standard deviation of three independent replicates.

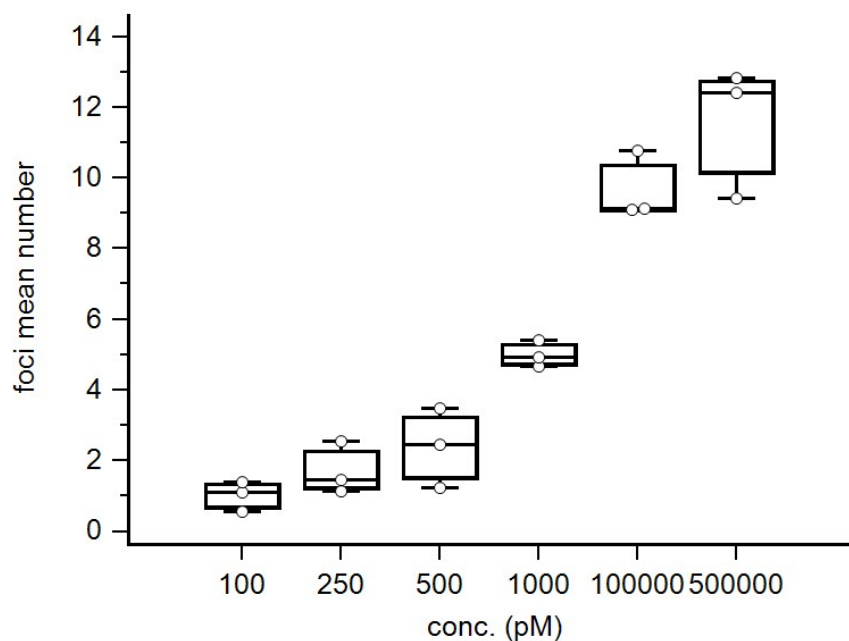

### One-way analysis of variance

|              |       |
|--------------|-------|
| Data         | foci1 |
| Factor codes | conc  |
| Sample size  | 18    |

### Levene's test for equality of error variances

|                    |           |
|--------------------|-----------|
| Levene statistic   | 3,027     |
| DF 1               | 5         |
| DF 2               | 12        |
| Significance level | P = 0,054 |

### ANOVA

| Source of variation                | Sum of Squares | DF | Mean Square |
|------------------------------------|----------------|----|-------------|
| Between groups (influence factor)  | 294,46         | 5  | 58,89       |
| Within groups (other fluctuations) | 13,10          | 12 | 1,09        |
| Total                              | 307,56         | 17 |             |
| F-ratio                            | 53,93          |    |             |
| Significance level                 | P < 0,001      |    |             |

### Scheffé test for all pairwise comparisons

| Factor     | n | Mean  | SD   | Different (P<0,05) from factor nr |
|------------|---|-------|------|-----------------------------------|
| (1) 100    | 3 | 1,02  | 0,43 | (4)(5)(6)                         |
| (2) 250    | 3 | 1,71  | 0,74 | (5)(6)                            |
| (3) 500    | 3 | 2,38  | 1,13 | (5)(6)                            |
| (4) 1000   | 3 | 5,01  | 0,37 | (1)(5)(6)                         |
| (5) 100000 | 3 | 9,68  | 0,96 | (1)(2)(3)(4)                      |
| (6) 500000 | 3 | 11,56 | 1,87 | (1)(2)(3)(4)                      |

Figure S6. Detailed statistical analysis of genotoxicity of FeO<sub>x</sub>-NP (negative control).

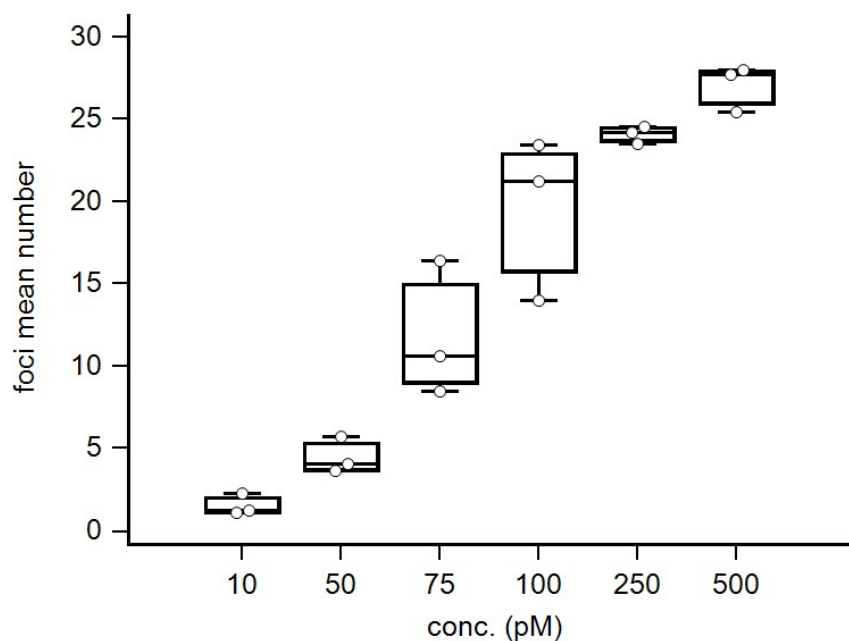

### One-way analysis of variance

|              |      |
|--------------|------|
| Data         | foci |
| Factor codes | conc |
| Sample size  | 18   |

### Levene's test for equality of error variances

|                    |           |
|--------------------|-----------|
| Levene statistic   | 5,163     |
| DF 1               | 5         |
| DF 2               | 12        |
| Significance level | P = 0,009 |

### ANOVA

| Source of variation                | Sum of Squares | DF | Mean Square |
|------------------------------------|----------------|----|-------------|
| Between groups (influence factor)  | 1652,97        | 5  | 330,59      |
| Within groups (other fluctuations) | 89,98          | 12 | 7,50        |
| Total                              | 1742,95        | 17 |             |
| F-ratio                            | 44,09          |    |             |
| Significance level                 | P < 0,001      |    |             |

### Scheffé test for all pairwise comparisons

| Factor  | n | Mean  | SD   | Different (P<0,05) from factor nr |
|---------|---|-------|------|-----------------------------------|
| (1) 10  | 3 | 1,53  | 0,62 | (3)(4)(5)(6)                      |
| (2) 50  | 3 | 4,45  | 1,09 | (4)(5)(6)                         |
| (3) 75  | 3 | 11,84 | 4,08 | (1)(5)(6)                         |
| (4) 100 | 3 | 19,56 | 4,96 | (1)(2)                            |
| (5) 250 | 3 | 24,11 | 0,51 | (1)(2)(3)                         |
| (6) 500 | 3 | 27,04 | 1,38 | (1)(2)(3)                         |

Figure S7. Detailed statistical analysis of genotoxicity of Au-NP (positive control).
